# Supplementary material for: The variety of genetic defects explains the phenotypic heterogeneity of Familial Hyperkalemic Hypertension
Source: PubMed Central journal article supplement — Kidney Int Rep. 2021 Aug 2;6(10):2639–52. doi: 10.1016/j.ekir.2021.07.025 (PMC8484123; doi:10.1016/j.ekir.2021.07.025), 2021-08-02
Supplement: mmc1.pdf [file mmc1.pdf]

Supplementary data

Supplementary Table 1. European recommendations for blood pressure classification stages adapted to age

| Children Category*   | 0–15 years SBP and/or DBP percentile             | 16 years and older SBP and/or DBP values (mmHg) | Adults Category*     | Systolic (mmHg) | Diastolic (mmHg) | Categories used in this study |
|----------------------|--------------------------------------------------|-------------------------------------------------|----------------------|-----------------|------------------|-------------------------------|
| Normal               | <90th                                            | <130/85                                         | Normal               | 120-129         | and/or 80-84     | 1                             |
| High-normal          | ≥90th to <95th percentile                        | 130–139/85–89                                   | High Normal          | 130-139         | and/or 85-89     | 2                             |
| Hypertension         | ≥95th percentile                                 | ≥ 140/90                                        | Grade 1 Hypertension | 140-159         | and/or 90-99     | 3                             |
| Stage 1 hypertension | 95th percentile to the 99th percentile and 5mmHg | 140–159/90–99                                   | Grade 2 Hypertension | 160-179         | and/or 100-109   | 4                             |
| Stage 2 hypertension | >99th percentile plus 5mmHg                      | 160–179/100–109                                 | Grade 3 hypertension | ≥180            | and/or ≥110      | 5                             |

Systolic Blood Pressure (SBP); Diastolic Blood Pressure (DBP). \*Lurbe E 2016; Williams B 2018

Supplementary Table 2.

List of the 64 pathogenic variants detected in the 4 genes of patients with familial hyperkalemic hypertension

| Gene                     | Mutation                    |                                 | ACMG criteria                    | ACMG class                                                                                               | Literature                                                            |
|--------------------------|-----------------------------|---------------------------------|----------------------------------|----------------------------------------------------------------------------------------------------------|-----------------------------------------------------------------------|
|                          | cDNA level                  | Protein level                   |                                  |                                                                                                          |                                                                       |
| <i>CUL3</i>              | c.1207-26A>G                | p.?                             | PS3 PM1 PM2 PP3 PP5              | 5                                                                                                        | Boyden et al, 2012; Ostrosky-Frid et al, 2012                         |
|                          | c.1207-17_120710delinsAAGAT | p.?                             | PM1 PM2 PP1 PP3                  | 4                                                                                                        | This publication                                                      |
|                          | c.1207-3C>A,                | p.?                             | PS2 PS4 PM1 PM2 PM6 PP3 PP5      | 5                                                                                                        | Boyden et al, 2012                                                    |
|                          | c.1207-2A>G;                | p.?                             | PVS1 PS2 PM1 PM2 PM6 PP3 PP4     | 5                                                                                                        | This publication                                                      |
|                          | c.1207-1G>A                 |                                 | PVS1 PS2 PS3 PM1 PM2 PM6 PP3 PP5 | 5                                                                                                        | Boyden et al, 2012; Araki Y et al, 2015                               |
|                          | c.1207-1_1207delinsAG       | p.?                             | PM1 PM2 PM6 PP5                  | 4                                                                                                        | This publication                                                      |
|                          | c.1236G>A                   | p.(Leu412=)                     | PS2 PS3 PM1 PM2 PM6 PP5          | 5                                                                                                        | Boyden et al, 2012                                                    |
|                          | c.1377+1G>A                 | p.?                             | PVS1 PM1 PM2 PP3 PP5             | 5                                                                                                        | Glover et al, 2014                                                    |
|                          | c.1377+2T>C                 | p.?                             | PVS1 PS2 PM1 PM2 PM6 PP3         | 5                                                                                                        | This publication                                                      |
|                          | c.1377+3A>T                 | p.?                             | PS2 PM1 PM2 PM6                  | 4                                                                                                        | This publication                                                      |
| c.1377+4A>G              | p.?                         | PS2 PM1 PM2 PM6                 | 4                                | This publication                                                                                         |                                                                       |
| <i>KLHL3</i><br>Dominant | c.233C>T                    | p.(Met78Thr)                    | PM2 PM5 PP2 PP3 PP5              | 4                                                                                                        | Hureaux 2029                                                          |
|                          | c.234G>A                    | p.(Met78Ile)                    | PM2 PM5 PP2 PP3 PP5              | 4                                                                                                        | Hureaux 2019                                                          |
|                          | c.444T>A                    | p.(His148Gln)                   | PM1 PM2 PP2 PP5                  | 4                                                                                                        | Hureaux et al, 2019                                                   |
|                          | c.491G>T                    | p.(Cys164Phe)                   | PS3 PS4 PM2 PP2 PP3 PP5          | 5                                                                                                        | Ohta et al, 2013                                                      |
|                          | c.683G>A                    | p.(Arg228His)                   | PM5 PM2 PP2 PP3                  | 4                                                                                                        | This publication                                                      |
|                          | c.922G>A;                   | p.(Gly308Ser)                   | PM2 PP1 PP2 PP3 PP5              | 4                                                                                                        | Hureaux et al, 2019                                                   |
|                          | c.1079G>A                   | p.(Arg360Gln)                   | PM1 PM2 PP2 PP3                  | 4                                                                                                        | This publication                                                      |
|                          | c.1081G>A                   | p.(Val361Met)                   | PM1 PM2 PP2 PP3 PP5              | 4                                                                                                        | Louis dit Picard et al, 2012                                          |
|                          | c.1084C>T                   | p.(Arg362Trp)                   | PM1 PM2 PP2 PP3 PP5              | 4                                                                                                        | Louis-dit-Picard et al, 2012                                          |
|                          | c.1156A>G                   | p.(Thr386Ala)                   | PS2 PM1 PM2 PP2 PP3              | 5                                                                                                        | This publication                                                      |
|                          | c.1205T>C                   | p.(Phe402Ser)                   | PM1 PM2 PP1 PP2 PP3 PP5          | 4                                                                                                        | Hureaux et al, 2019                                                   |
|                          | c.1229C>T                   | p.(Ser410Leu)*                  | PS3 PM2 PP2 PP3 PP5              | 4                                                                                                        | Boyden et al, 2012; Mori et al, 2013                                  |
|                          | c.1295G>A                   | p.(Ser432Asn)                   | PS3 PM1 PM2 PP2 PP3              | 5                                                                                                        | Boyden et al, 2012; Ohta et al, 2013                                  |
|                          | c.1297A>G                   | p.(Ser433Gly)                   | PS2 PS3 PM1 PM2 PM5 PP2 PP3 PP5  | 5                                                                                                        | Louis-dit-Picard et al, 2012; Ishizawa et al, 2016                    |
|                          | c.1298G>A                   | p.(Ser433Asn)                   | PS2 PS3 PM1 PM2 PM5 PP2 PP3 PP5  | 5                                                                                                        | Boyden et al, 2012; Lifton et al.2012, Ohta 2013, Shibata et al, 2014 |
|                          | c.1300G>A                   | p.(Val434Met)                   | PM1 PM2 PP1 PP2 PP3 PP5          | 4                                                                                                        | Hureaux et al, 2019                                                   |
|                          | c.1442G>A                   | p.(Ser481Asn)                   | PM1 PM2 PP2 PP3                  | 4                                                                                                        | This publication                                                      |
|                          | c.1480G>A                   | p.(Ala494Thr)                   | PS3 PM2 PP1 PP2 PP3 PP5          | 4                                                                                                        | Boyden et al, 2012; Ohta 2013, Glover et al, 2014                     |
|                          | c.1492C>T                   | p.(His498Tyr)                   | PM2 PM5 PP1 PP2 PP3 PP5          | 4                                                                                                        | Kelly et al, 2016                                                     |
|                          | c.1493A>G                   | p.(His498Arg)                   | PM1 PM2 PM5 PP2                  | 4                                                                                                        | This publication                                                      |
| c.1499G>T                | p.(Gly500Val)*              | PM1 PM2 PP2 PP3 PP5             | 4                                | Louis-dit-Picard et al, 2012 (in Dominant form); Glover et al, 2014                                      |                                                                       |
| c.1582C>T                | p.(Arg528Cys)               | PS3 PM1 PM2 PM5 PP2 PP5         | 5                                | Boyden et al, 2012; Ohta 2013, Wu et al.                                                                 |                                                                       |
| c.1583G>A                | p.(Arg528His)               | PS2 PS3 PS4 PM2 PM5 PP2 PP3 PP5 | 5                                | Louis dit Picard et al, 2012 and Boyden et al, 2012;Ohta 213; Mori et al, 2013;Susa K Sasaki et al, 2017 |                                                                       |
| c.1587C>A                | p.(Asn529Lys)               | PS3 PM1 PM2 PP2 PP3 PP5         | 4                                | Louis-dit-Picard et al, 2012; Ohta 2013, Schumacher et al, 2014                                          |                                                                       |

|                           |                                  |                    |                             |   |                              |
|---------------------------|----------------------------------|--------------------|-----------------------------|---|------------------------------|
|                           | c.1643C>A                        | p.(Ser548Tyr)      | PM1 PM2 PP1 PP2 PP3         | 4 | This publication             |
| <i>KLHL3</i><br>Recessive | c.14+1G>A                        | p.?                | PVS1 PM2 PM3 PP3            | 5 | This publication             |
|                           | c.228del                         | p.(Cys76Trpfs*16)  | PVS1 PM1 PM2 PP1 PP3        | 5 | This publication             |
|                           | c.682C>G                         | p.(Arg228Gly)      | PM2 PM3 PM5 PP2 PP3 PP5     | 4 | Louis-dit-Picard et al, 2012 |
|                           | c.830T>C                         | p.(Leu277Pro)      | PM1 PM2 PM3 PP2 PP3         | 4 | This publication             |
|                           | c.1045G>A                        | p.(Val349Met)      | PM1 PM2 PP2 PP3             | 4 | This publication             |
|                           | c.1150C>T                        | p.(Arg384Trp)      | PM1 PM2 PM5 PP1 PP2 PP3 PP5 | 4 | Louis-dit-Picard et al, 2012 |
|                           | c.1192G>A                        | p.(Ala398Thr)      | PM1 PM2 PM5 PP1 PP2 PP3     | 4 | Louis-dit-Picard et al, 2012 |
|                           | c.1277C>T                        | p.(Pro426Leu)      | PM1 PM2 PP1 PP2 PP5         | 4 | Louis-dit-Picard et al, 2012 |
|                           | c.1291C>T                        | p.(Arg431Trp)      | PM1 PM2 PM5 PP1 PP2 PP3     | 4 | This publication             |
|                           | c.1360del                        | p.(Arg454Alafs*4)  | PVS1 PM1 PM2 PP1 PP3        | 5 | This publication             |
|                           | c.1535del                        | p.(Pro512Leufs*12) | PVS1 PM2 PP3                | 5 | This publication             |
|                           | c.1579C>T                        | p.(Arg527Trp)      | PM1 PM2 PP2 PP3             | 4 | This publication             |
|                           | c.1580G>A                        | p.(Arg527Gln)      | PM1 PM2 PM3 PP2 PP3         | 4 | This publication             |
| <i>WNK1</i>               | c.1888G>A                        | p.(Glu630Lys)      | PM1 PM2 PP1 PP3             | 4 | This publication             |
|                           | c.1891G>A                        | p.(Glu631Lys)      | PS3 PM1 PM2 PP1 PP5         | 5 | Louis-dit-Picard et al, 2020 |
|                           | c.1900G>A                        | p.(Ala634Thr)      | PS3 PM1 PM2 PM5 PP5         | 5 | Louis-dit-Picard et al, 2020 |
|                           | c.1901C>G                        | p.(Ala634Gly)      | PM1 PM2 PM5 PP1 PP3         | 4 | This publication             |
|                           | c.1903G>A                        | p.(Asp635Asn)      | PS3 PM1 PM2 PM5 PP5         | 5 | Louis-dit-Picard et al, 2020 |
|                           | c.1905T>A                        | p.(Asp635Glu)      | PS3 PM1 PM2 PM5 PP1 PP5     | 5 | Louis-dit-Picard et al, 2020 |
|                           | c.1906C>G                        | p.(Gln636Glu)      | PS3 PM1 PM2 PM5 PP1 PP4 PP5 | 5 | Louis-dit-Picard et al, 2020 |
|                           | c.1907A>G                        | p.(Gln636Arg)      | PS3 PM1 PM2 PM5 PP1 PP4 PP5 | 5 | Louis-dit-Picard et al, 2020 |
|                           | Intron 1 large deletion of 21 Kb |                    | PVS1, PM2                   | 4 | This publication             |
|                           | Intron 1 large deletion of 23 Kb |                    | PVS1, PM2                   | 4 | This publication             |
|                           | Intron 1 large deletion of 41 Kb |                    | PVS1,PS3, PM2               | 5 | Wilson FH et al, 2001        |
| <i>WNK4</i>               | c.1682C>A                        | p.(Pro561Gln)      | PM1 PM2 PM5 PP1 PP3         | 4 | This publication             |
|                           | c.1682C>G                        | p.(Pro561Arg)      | PM1 PM2 PM5 PP1 PP5         | 4 | Mori et al, 2017             |
|                           | c.1690G>A                        | p.(Asp564Asn)      | PM1 PM2 PM5 PP1 PP5         | 4 | Sakoh et al, 2019            |
|                           | c.3553C>T                        | p.(Arg1185Cys)     | PM1 PM2 PP1 PP3 PP5         | 4 | Wilson et al, 2001           |

A total of 64 different pathogenic or probably pathogenic variants were found in the 4 genes responsible for FHHT in our French cohort: 11 in *CUL3*; 25 in *KLHL3* Dominant form; 13 in *KLHL3* Recessive form; 11 in *WNK1* and 4 in *WNK4*. Among them, 25 mutations (39%) are newly described. 2 *KLHL3* Dominant variants are also described in Recessive form in literature (marked with an asterisk).

**ACMG criteria description:** **PVS:** very strong evidence of pathogenicity. **PVS1:** null variant (nonsense, frameshift, canonical +/-1 or 2 splice sites, initiation codon, single or multi-exon deletion) in a gene where loss of function is a known mechanism of disease. **PS:** strong evidence of pathogenicity. **PS1:** same amino acid change as a previously established pathogenic variant regardless of nucleotide change. **PS2:** de novo (both maternity and paternity confirmed) in a patient with the disease and no family history **PS3:** well-established in vitro or in vivo functional studies supportive of a damaging effect on the gene or gene product. **PS4:** the prevalence of the variant in affected individuals is significantly increased compared to the prevalence in controls. **PM:** moderate evidence of pathogenicity. **PM1:** Located in a mutational hot spot and/or critical and well-established functional domain without benign variation. **PM2:** absent from controls (or at extremely low frequency if recessive) in gnomAD database. **PM3:** detected in trans with a pathogenic variant (the phase was determined). **PM4:** protein length changes due to in-frame deletions/insertions in a non-repeat region or stop-loss variants. **PM5:** Novel missense change at an amino acid residue where a different missense change determined to be pathogenic has been seen before. **PM6:** Assumed de novo, but without confirmation of paternity and maternity. **PP:** supporting evidence of pathogenicity. **PP1:** co-segregation with disease in multiple affected family members in a gene definitively known to cause the disease. **PP2:** Missense variant in a gene that has a low rate of benign missense variation and in which missense variants. **PP3:** Multiple lines of computational evidence support a deleterious effect on the gene or gene product. **PP4:** Patient's phenotype or family history is highly specific for a disease with a single genetic aetiology. **PP5:** Reputable source recently reports variant as pathogenic but the evidence is not available to the laboratory to perform an independent evaluation.

Supplementary Table 3a.

Criteria of pathogenicity of new missense variants

| Gene                      | Mutation   |               | Allelic frequency in gnomAD* (%) | <i>In silico</i> prediction |                   |                 |            | Familial segregation |
|---------------------------|------------|---------------|----------------------------------|-----------------------------|-------------------|-----------------|------------|----------------------|
|                           |            |               |                                  | SIFT                        | Poly-Phen-2       | Mutation Taster | CADD score |                      |
|                           | cDNA level | Protein level |                                  |                             |                   |                 |            |                      |
| <i>KLHL3</i><br>Dominant  | c.683G>A   | p.(Arg228His) | 0.00040                          | Deleterious                 | Probably Damaging | Disease causing | 31         | No                   |
|                           | c.1079G>A  | p.(Arg360Gln) | Absent                           | Deleterious                 | Probably Damaging | Disease causing | 32         | No                   |
|                           | c.1156A>G  | p.(Thr386Ala) | Absent                           | Deleterious                 | Probably Damaging | Disease causing | 26.2       | Yes, <i>de novo</i>  |
|                           | c.1442G>A  | p.(Ser481Asn) | Absent                           | Deleterious                 | Probably Damaging | Disease causing | 23.7       | No                   |
|                           | c.1493A>G  | p.(His498Arg) | Absent                           | Deleterious                 | Benign            | Disease causing | 26.9       | No                   |
|                           | c.1643C>A  | p.(Ser548Tyr) | 0.00080                          | Deleterious                 | Probably Damaging | Disease causing | 28.4       | Yes                  |
| <i>KLHL3</i><br>Recessive | c.830T>C   | p.(Leu277Pro) | Absent                           | Deleterious                 | Probably Damaging | Disease causing | 26         | Yes                  |
|                           | c.1045G>A  | p.(Val349Met) | Absent                           | Deleterious                 | Probably Damaging | Disease causing | 24.2       | No                   |
|                           | c.1291C>T  | p.(Arg431Trp) | 0.00040                          | Deleterious                 | Probably Damaging | Disease causing | 11.73      | Yes                  |
|                           | c.1579C>T  | p.(Arg527Trp) | 0.0016                           | Deleterious                 | Probably Damaging | Disease causing | 14.32      | No                   |
|                           | c.1580G>A  | p.(Arg527Gln) | Absent                           | Deleterious                 | Probably Damaging | Disease causing | 32         | Yes                  |
| <i>WNK1</i>               | c.1888G>A  | p.(Glu630Lys) | Absent                           | Deleterious                 | Probably Damaging | Disease causing | 29.6       | Yes                  |
|                           | c.1901C>G  | p.(Ala634Gly) | Absent                           | Deleterious                 | Possibly Damaging | Disease causing | 24.2       | No                   |
| <i>WNK4</i>               | c.1682C>A  | p.(Pro561Gln) | Absent                           | Deleterious                 | Probably Damaging | Disease causing | 25.3       | Yes                  |

Supplementary Table 3b

Criteria of pathogenicity of new splice-site variants

| Gene                      | Mutation              |               | Allelic frequency in gnomAD* (%) | <i>In silico</i> prediction** |                             |                             |           | Familial segregation                                    |
|---------------------------|-----------------------|---------------|----------------------------------|-------------------------------|-----------------------------|-----------------------------|-----------|---------------------------------------------------------|
|                           |                       |               |                                  | MaxEntScan                    | NNSPLICE                    | Human Splicing Finder       | SPiP Risk |                                                         |
|                           | cDNA level            | Protein level |                                  |                               |                             |                             |           |                                                         |
| <i>CUL3</i>               | c.1207-2A>G;          | p.?           | Absent                           | -100.0%                       | -100.0%                     | -100.0%                     | 98.67%    | Yes, <i>de novo</i>                                     |
|                           | c.1207-1_1207delinsAG | p.?           | Absent                           | -100.0%                       | -100.0%                     | -100.0%                     | 98.67%    | Yes, <i>de novo</i>                                     |
|                           | c.1377+2T>C           | p.?           | Absent                           | -100.0%                       | -100.0%                     | -100.0%                     | 97.46%    | Yes, <i>de novo</i> in one family and inherited from th |
|                           | c.1377+3A>T           | p.?           | Absent                           | Creation of new splice site   | Creation of new splice site | Creation of new splice site | 96.95%    | Yes, <i>de novo</i>                                     |
|                           | c.1377+4A>G           | p.?           | Absent                           | Creation of new splice site   | Creation of new splice site | Creation of new splice site | 96.95%    | Yes, <i>de novo</i>                                     |
| <i>KLHL3</i><br>Recessive | c.14+1G>A             | p.?           | Absent                           | -100.0%                       | -100.0%                     | -100.0%                     | 97.46%    |                                                         |

\*\* expressed as the decrease percentage compared with normal score

Supplementary Table 4a. Basic clinical and biochemical characteristics of the 19 *CUL3* patients (index cases and affected relatives).

| <b>Patient Id</b> | <b>Age at onset (years)</b> | <b>Sex (M/F)</b> | <b>HBP Grade</b> | <b>Na+ mmol/L</b> | <b>K+ mmol/L</b> | <b>Cl- mmol/L</b> | <b>HCO<sub>3</sub>- mmol/L</b> | <b>GFR ml/min/1.73m<sup>2</sup> (MDRD/Schwartz)</b> | <b>Renin (pg/mL)</b> | <b>Aldo (pg/mL)</b> |
|-------------------|-----------------------------|------------------|------------------|-------------------|------------------|-------------------|--------------------------------|-----------------------------------------------------|----------------------|---------------------|
| <b>08001</b>      | 1.5                         | F                | 2                | na                | 6.9              | 115               | 12                             | na                                                  | na                   | na                  |
| <b>09001</b>      | 33                          | M                | 3                | 142               | 7.3              | 104               | 14.6                           | 103                                                 | na                   | 93                  |
| <b>09002</b>      | na                          | M                | 3                | na                | 7.7              | 114               | na                             | na                                                  | na                   | na                  |
| <b>25001</b>      | 15                          | F                | 3                | 140               | 5.8              | 111               | 19                             | 100                                                 | 2.9                  | 544                 |
| <b>27001</b>      | 2                           | M                | 3                | na                | 9.6              | 113               | 12                             | na                                                  | na                   | na                  |
| <b>44001</b>      | 0.7                         | M                | 1                | 136               | 7.4              | 111               | 16.2                           | na                                                  | na                   | 94                  |
| <b>59001</b>      | 6                           | M                | 3                | 137               | 8.7              | 114               | 16                             | 117                                                 | 19.0                 | 537                 |
| <b>62001</b>      | 9                           | M                | 3                | 137               | 7.1              | 111               | 17                             | 129                                                 | 0.6                  | 110                 |
| <b>78001</b>      | 4                           | F                | 3                | 141               | 7.4              | 118               | 15.5                           | 85                                                  | na                   | na                  |
| <b>103001</b>     | 2                           | M                | 3                | 137               | 6.8              | 122               | na                             | 100                                                 | na                   | na                  |
| <b>103011</b>     | na                          | F                | na               | na                | na               | na                | na                             | na                                                  | na                   | na                  |
| <b>109001</b>     | 12                          | F                | 3                | 135               | 7.7              | 117               | 15.7                           | 132                                                 | 0.7                  | 30                  |
| <b>127001</b>     | 5                           | F                | 3                | 135               | 6.8              | 113               | 17                             | 197                                                 | 2.9                  | 6                   |
| <b>132001</b>     | 22                          | F                | 3                | 138               | 5.3              | 106               | 21.3                           | 128                                                 | na                   | 507                 |
| <b>132011</b>     | na                          | F                | na               | na                | na               | na                | na                             | na                                                  | na                   | na                  |
| <b>146-001</b>    | 4                           | F                | 3                | 140               | 6.8              | 112               | 16                             | na                                                  | 0.6                  | 164                 |
| <b>154001</b>     | 15                          | M                | na               | na                | na               | na                | na                             | na                                                  | na                   | na                  |
| <b>155001</b>     | 1                           | F                | 2                | 138               | 6.8              | 116               | 15.5                           | na                                                  | 2.5                  | 15                  |
| <b>182001</b>     | 10                          | M                | na               | na                | na               | na                | na                             | na                                                  | na                   | na                  |
| <b>Median</b>     | <b>5.5</b>                  | <b>-</b>         | <b>3</b>         | <b>138</b>        | <b>7.1</b>       | <b>113</b>        | <b>16</b>                      | <b>117</b>                                          | <b>2.5</b>           | <b>102</b>          |

na: not available

Supplementary Table 4b: Growth clinical and biological data of *CUL3* patients (index cases and affected relatives)

| Patient Id    | clinical findings                               | Sex | Age at work-up | Weight (Kg) | Z-score weight | height (cm) | Z-score height | BMI (Kg/m2) | Total Calcium (mmol/l) | Ionized Calcium (mmol/l) | Phosphate (mmol/l) | Calcium/creat (mmol/mmol) |
|---------------|-------------------------------------------------|-----|----------------|-------------|----------------|-------------|----------------|-------------|------------------------|--------------------------|--------------------|---------------------------|
| 08001         | Growth retardation                              | F   | 1.5            | 9           | -1.5           | 70          | -4             | 18.3        | na                     | na                       | na                 | na                        |
| 09001         | Muscles fatigue and episodes of paralysis       | M   | 43             | 61          | -1             | 161         | -2             | 23.5        | na                     | na                       | na                 | na                        |
| 09002         | Sharp T waves on ECG                            | M   | 17             | 48          | -2.5           | 159         | -2             | 18.9        | na                     | na                       | na                 | na                        |
| 25001         |                                                 | F   | 15             | 49          | -1             | 151         | -2             | 21.4        | na                     | na                       | na                 | na                        |
| 27001         |                                                 | M   | 2              | 10.8        | -2.5           | 91          | 1              | 13          | na                     | na                       | na                 | na                        |
| 44001         | Growth retardation                              | M   | 0.9            | 9           | -1             | 74          | 0              | 16.4        | na                     | na                       | na                 | na                        |
| 59001         |                                                 | M   | 6              | 20.5        | 0              | 121         | 0.5            | 14          | na                     | na                       | na                 | na                        |
| 62001         | Developmental and behavioral disorder           | M   | 9              | 26          | -1             | 128         | -1             | 15.8        | 2.54                   | na                       | 2.1                | na                        |
| 78001         |                                                 | F   | 4              | 16          | 0              | 100         | -1             | 16          | na                     | na                       | na                 | na                        |
| 103001        | na                                              | M   | 2              | 9           | -3             | 83          | -2             | 13          | 2.55                   | 1.23                     | 1.48               | na                        |
| 103011        | na                                              | F   | na             | na          | na             | na          | na             | na          | na                     | na                       | na                 | na                        |
| 109001        | Growth retardation, dyshidrotic eczema on hands | F   | 12             | 28.3        | -2.5           | 135         | -5             | 15.5        | 2.2                    | na                       | 1.85               | na                        |
| 127001        | Growth and developmental retardation            | F   | 6.5            | 17.6        | -2             | 111         | -2             | 14.2        | 2.33                   | 1.19                     | na                 | na                        |
| 132001        |                                                 | F   | 24             | 55          | 0              | 150         | -2             | 24.4        | na                     | na                       | 1.23               | 0.24                      |
| 132011        | na                                              | F   | na             | na          | na             | na          | na             | na          | na                     | na                       | na                 | na                        |
| 146001        | Growth retardation since 18 months              | F   | 5              | na          | na             | na          | na             | na          | 2.31                   | na                       | 1.57               | na                        |
| 154001        | na                                              | M   | 16             | na          | na             | na          | na             | na          | na                     | na                       | na                 | na                        |
| 155001        | Growth retardation                              | F   | 1              | na          | na             | na          | na             | na          | 2.42                   | na                       | 1.81               | na                        |
| 182001        | Growth retardation                              | M   | 13             | 33          | -2             | 133         | -3             | 18.6        | na                     | na                       | na                 | 0.22                      |
| <b>Median</b> |                                                 |     | 6.5            | 23.3        | -1.3           | 125         | -2             | 16.6        | 2.4                    | 1.2                      | 1.7                | 0.2                       |

na: not available.

Supplementary Table 5: Growth parameters for all familial hyperkalemic hypertension genotypes

|                          | <i>WNK1</i> ac.m<br>(n=29)        | <i>WNK1</i> int1del<br>(n=23)         | <i>WNK4</i><br>(n=10)             | <i>KLHL3</i> AD<br>(n=56)           | <i>KLHL3</i> AR<br>(n=16) | <i>CUL3</i><br>(n=19)                      | Kruskal-<br>Wallis test |
|--------------------------|-----------------------------------|---------------------------------------|-----------------------------------|-------------------------------------|---------------------------|--------------------------------------------|-------------------------|
| n with avail.<br>Data    | 21                                | 19                                    | 6                                 | 32                                  | 6                         | 14                                         |                         |
| Age at work-<br>up       | 27[6;46]                          | 36[17;49] <sup>i3</sup>               | 38[13;43]                         | 33[19;52] <sup>n3</sup>             | 9[4;26]                   | 7[2;16] <sup>i3n3</sup>                    | < 0.0001                |
| Weight (Kg)              | 51[33;61] <sup>c1</sup>           | 68[57;79] <sup>i3</sup>               | 67[66;98] <sup>l2</sup>           | 69[57;81] <sup>c1n3</sup>           | 61[19;66]                 | 23[10;48] <sup>i3l2n3</sup>                | < 0.0001                |
| Height (cm)              | 157[133;166]                      | 169[160;175] <sup>i3</sup>            | 162[110;170]                      | 160[151;169] <sup>n1</sup>          | 155[114;163]              | 125[89;150] <sup>i3n1</sup>                | 0.0002                  |
| BMI (Kg/m <sup>2</sup> ) | 19.5[18.0;22.6] <sup>c</sup><br>2 | 21.9[18.9;28.4] <sup>i1</sup>         | 28.4[23.7;37.3] <sup>l</sup><br>2 | 26.1[22.3;30.9] <sup>c2n</sup><br>3 | 24.5[15.0;25.4]           | 16.2[14.2;19.5] <sup>i1l2n</sup><br>3      | < 0.0001                |
| Z-score weight           | 0.0[-1.7;+0.3] <sup>c1</sup>      | 0.7[0.0;+1.3] <sup>i3</sup>           | 0.7[0.0;+2.1] <sup>l2</sup>       | 1.3[0.0;+1.7] <sup>c1n3</sup>       | 0.0[0.0;+0.2]             | -1.3[-2.5; and -<br>0.8] <sup>i3l2n3</sup> | < 0.0001                |
| Z-score height           | -1.0[-2.0;and +<br>0.3]           | 0.0[-0.5;and<br>+1.0] <sup>g2i2</sup> | 0.0[-0.9;0.0]                     | -1.5[-2.0;-1.0] <sup>g2</sup>       | -1.5[-2.5; and<br>+0.4]   | -2.0[-2.3;-0.8] <sup>i2</sup>              | 0.0011                  |
| Growth failure           | 28% (6/21)                        | 11% (2/19)                            | 0% (0/6)                          | 34% (11/32)                         | 50% (3/6)                 | 71% (10/14)                                |                         |

Values are given in median [IQR].

Growth failure is defined by a Z-score of height and/or of weight inferior or equal to -2 standard deviation. Statistical significance is given by superscript after square brackets as follow: *WNK1* ac.m vs *KLHL3* AD: c; *WNK1* int1del vs *KLHL3* AD: g; *WNK1* int1del vs *CUL3*:i; *WNK4* vs *CUL3*: l; *KLHL3* AD vs *CUL3*: n. \* is 1, \*\* is 2 and \*\*\* is 3.

Supplementary Table 6: Response to hydrochlorothiazide

| Parameters                                      | <i>WNK1</i> acidic motif (n=29) | <i>KLHL3</i> AD (n=56)     | <i>KLHL3</i> AR (n=16) | <i>CUL3</i> (n=19)           | <i>P</i> Value (Kruskal-Wallis test) |
|-------------------------------------------------|---------------------------------|----------------------------|------------------------|------------------------------|--------------------------------------|
| Delta of SBP (mmHg)                             | 0.5[0.0;13.0]                   | 13.5[2.2 ;30.5]            | 24.0[19.0;28.0]        | 21.5[17.5;44.3]              | 0.0394                               |
| number of values                                | 4                               | 10                         | 5                      | 10                           |                                      |
| Delta of DBP (mmHg)                             | 7.5[1.5;21.8]                   | 10.0[1.8;30.3]             | 3.0[1.5;24.5]          | 17.0[10.0;31.3]              | 0.2421                               |
| number of values                                | 4                               | 10                         | 5                      | 10                           |                                      |
| Delta of K <sup>+</sup> (mmol/l)                | 1.6[1.4;1.8] <sup>m1</sup>      | 1.9[0.5;2.4] <sup>n2</sup> | 2.2[1.5;3.5]           | 3.3[2.0;4.0] <sup>m1n2</sup> | 0.0049                               |
| number of values                                | 7                               | 15                         | 9                      | 12                           |                                      |
| Delta of Cl <sup>-</sup> (mmol/l)               | 6.0[5.5;9.0]                    | 3.5[2.0;5.0]               | 11.0[4.5;13.5]         | 7.0[2.8;16.3]                | 0.1409                               |
| number of values                                | 5                               | 4                          | 8                      | 10                           |                                      |
| Delta of HCO <sub>3</sub> <sup>-</sup> (mmol/l) | 4.5[4.0;6.7] <sup>m1</sup>      | 6.0[5.0;7.0]               | 7.6[4.9;9.0]           | 12.5[7.3;15.3] <sup>m1</sup> | 0.0139                               |
| number of values                                | 4                               | 7                          | 9                      | 10                           |                                      |

Values are given in median [interquartile 25%; interquartile 75%]. *WNK1* intron 1 deletion and *WNK4* groups were excluded due to lack of data. Statistical significance is given by superscript after square brackets as follow: *WNK1* acidic motif vs *CUL3*: m; *KLHL3 AD* vs *CUL3*: n. \* is 1, \*\* is 2.



Supplementary Figure 1. Genotype distribution of pediatric and adult populations with familial hyperkalemic hypertension.

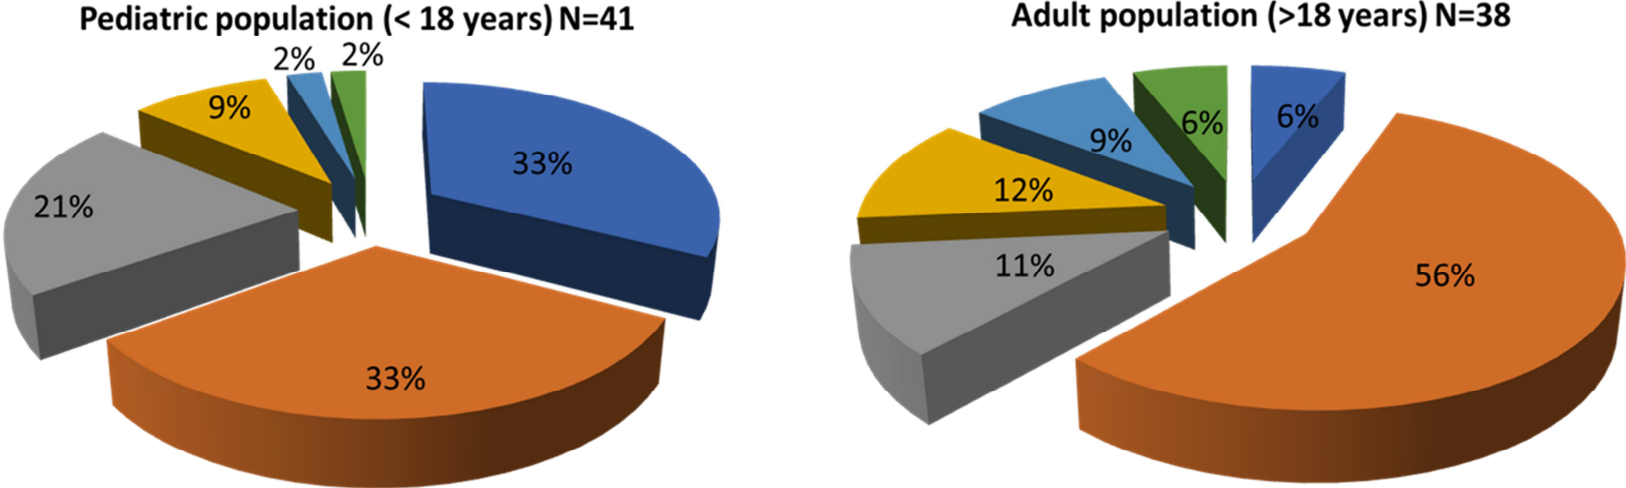

■ CUL3 ■ KLHL3 AD ■ KLHL3 AR ■ WNK1 Ac. M ■ WNK4 ■ WNK1 Intron 1 del ■ CUL3 ■ KLHL3 AD ■ KLHL3 AR ■ WNK1 Ac. M ■ WNK4 ■ WNK1 Intron 1 del.

Supplementary Figure 2. Blood pressure and familial hyperkalemic hypertension genotypes

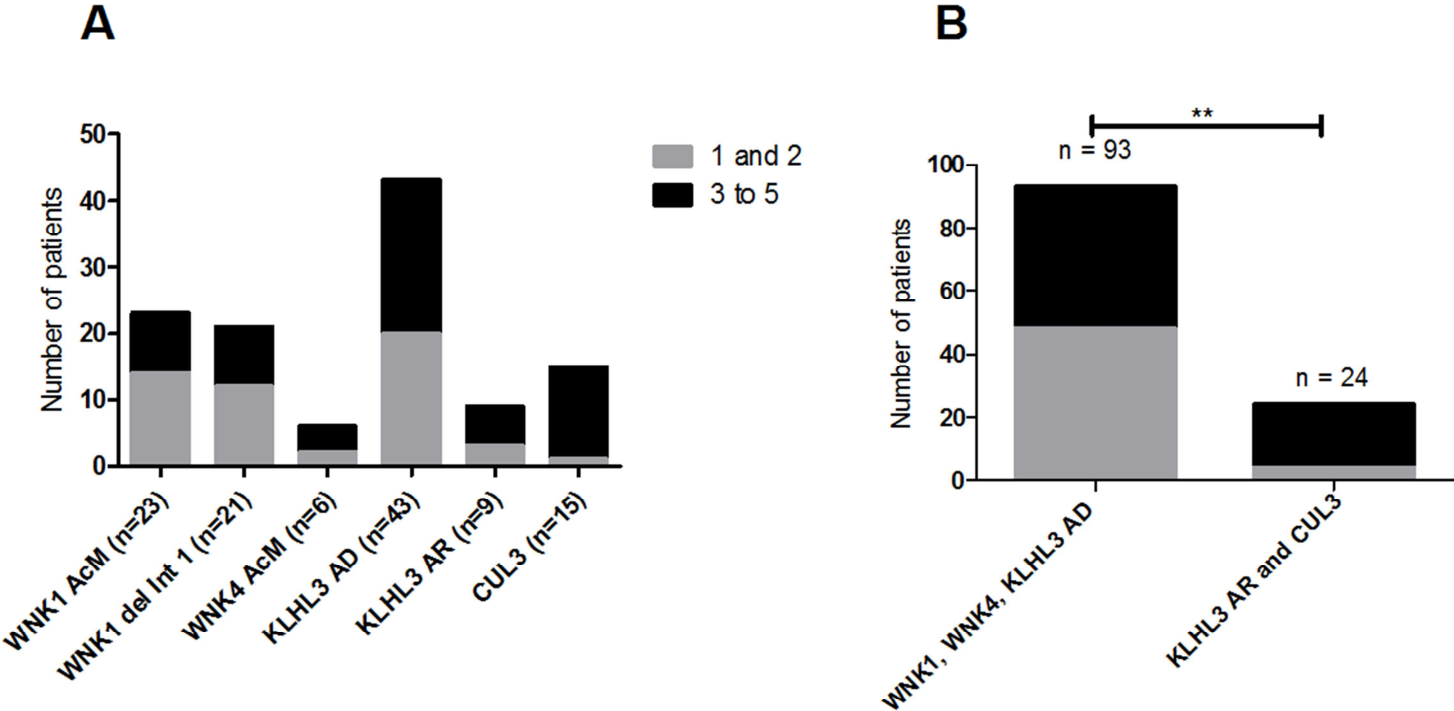

Supplementary figure 3: Response to hydrochlorothiazide

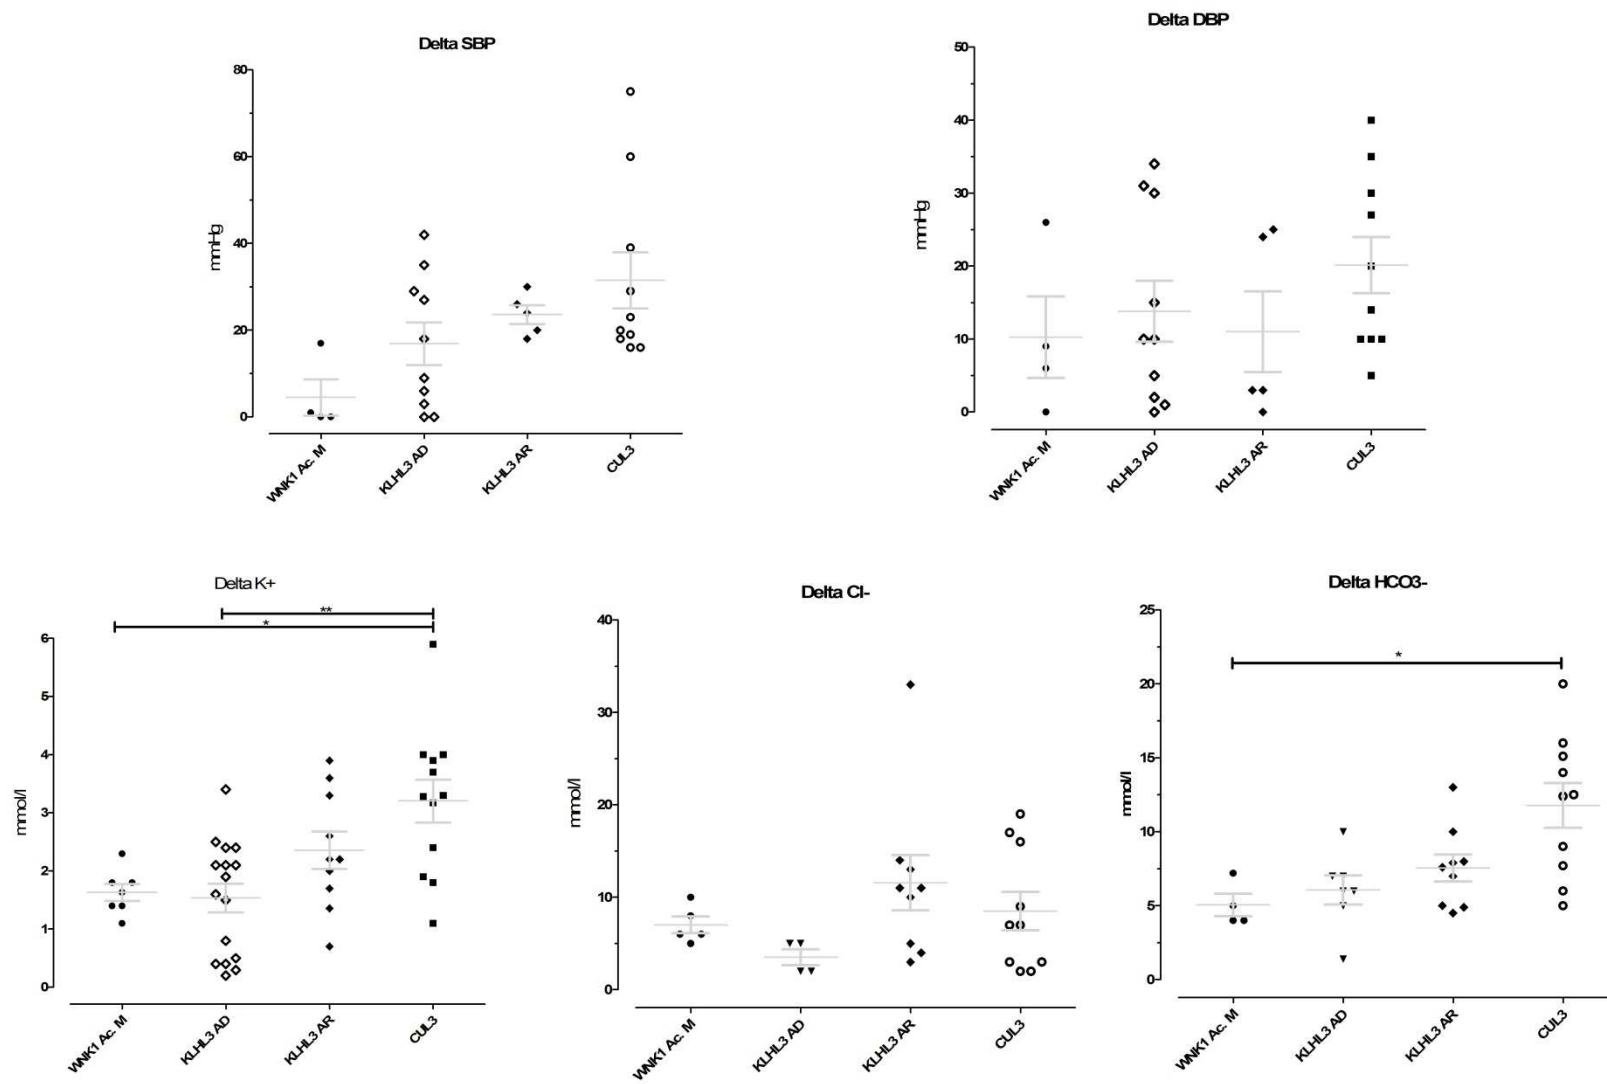

Response to hydrochlorothiazide: “Delta analyses” of Cl<sup>-</sup>, HCO<sub>3</sub><sup>-</sup>, SBP and DBP: graphical representation of available data. “Delta analyses” correspond to the difference (increase or decrease of clinical and biochemical parameters) before and after HCTZ treatment. We observed a significant difference with higher response to treatment in *CUL3* patients for kalemia ( $P = 0.0049$ ) and bicarbonates ( $P = 0.0139$ ). Median and Interquartile in grey bars.

Supplementary Figure 4. Delta of K+ under hydrochlorothiazide treatment versus basal kalemia

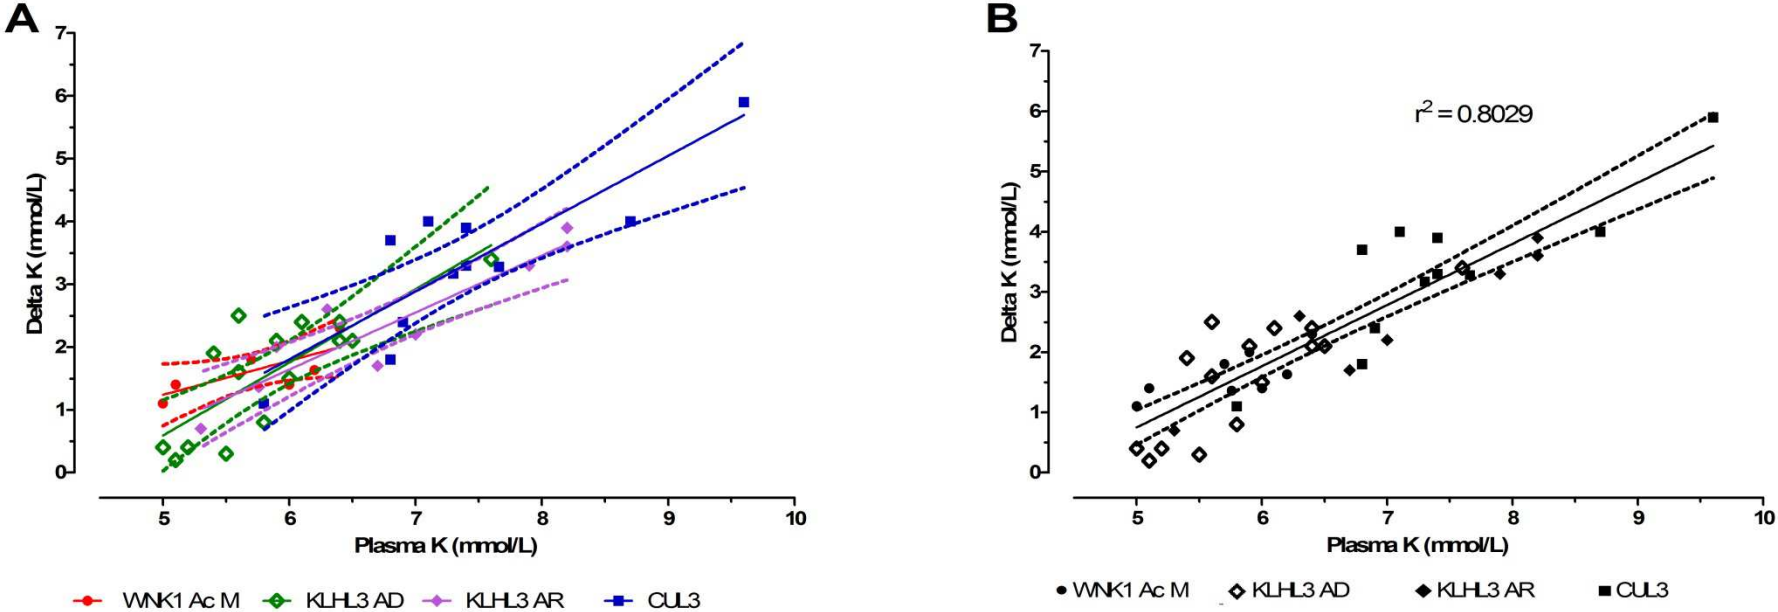

Linear regression analysis of Delta of K+ versus basal kalemia. A. The slopes of the different groups are not significantly different. B. A global significant association exists between the basal plasma K<sup>+</sup> values and the decrease observed in hydrochlorothiazide ( $P < 0.0001$ ).

# Reporting checklist for cross sectional study.

Based on the STROBE cross sectional guidelines.

## Instructions to authors

Complete this checklist by entering the page numbers from your manuscript where readers will find each of the items listed below.

Your article may not currently address all the items on the checklist. Please modify your text to include the missing information. If you are certain that an item does not apply, please write "n/a" and provide a short explanation.

Upload your completed checklist as an extra file when you submit to a journal.

In your methods section, say that you used the STROBE cross sectional reporting guidelines, and cite them as:

von Elm E, Altman DG, Egger M, Pocock SJ, Gøtzsche PC, Vandenbroucke JP. The Strengthening the Reporting of Observational Studies in Epidemiology (STROBE) Statement: guidelines for reporting observational studies.

|                           |                     | Reporting Item                                                                                                       | Page Number |
|---------------------------|---------------------|----------------------------------------------------------------------------------------------------------------------|-------------|
| <b>Title and abstract</b> |                     |                                                                                                                      |             |
| Title                     | <a href="#">#1a</a> | Indicate the study's design with a commonly used term in the title or the abstract                                   | 2           |
| Abstract                  | <a href="#">#1b</a> | Provide in the abstract an informative and balanced summary of what was done and what was found                      | 2           |
| <b>Introduction</b>       |                     |                                                                                                                      |             |
| Background / rationale    | <a href="#">#2</a>  | Explain the scientific background and rationale for the investigation being reported                                 | 4           |
| Objectives                | <a href="#">#3</a>  | State specific objectives, including any prespecified hypotheses                                                     | 5           |
| <b>Methods</b>            |                     |                                                                                                                      |             |
| Study design              | <a href="#">#4</a>  | Present key elements of study design early in the paper                                                              | 5-7         |
| Setting                   | <a href="#">#5</a>  | Describe the setting, locations, and relevant dates, including periods of recruitment, exposure, follow-up, and data | 5-6         |

|                            |                      |                                                                                                                                                                                                                                                                                |       |
|----------------------------|----------------------|--------------------------------------------------------------------------------------------------------------------------------------------------------------------------------------------------------------------------------------------------------------------------------|-------|
|                            |                      | collection                                                                                                                                                                                                                                                                     |       |
| Eligibility criteria       | <a href="#">#6a</a>  | Give the eligibility criteria, and the sources and methods of selection of participants.                                                                                                                                                                                       | 5     |
|                            | <a href="#">#7</a>   | Clearly define all outcomes, exposures, predictors, potential confounders, and effect modifiers. Give diagnostic criteria, if applicable                                                                                                                                       | 5-7   |
| Data sources / measurement | <a href="#">#8</a>   | For each variable of interest give sources of data and details of methods of assessment (measurement). Describe comparability of assessment methods if there is more than one group. Give information separately for for exposed and unexposed groups if applicable.           | 6     |
| Bias                       | <a href="#">#9</a>   | Describe any efforts to address potential sources of bias                                                                                                                                                                                                                      | 16    |
| Study size                 | <a href="#">#10</a>  | Explain how the study size was arrived at                                                                                                                                                                                                                                      | 5     |
| Quantitative variables     | <a href="#">#11</a>  | Explain how quantitative variables were handled in the analyses. If applicable, describe which groupings were chosen, and why                                                                                                                                                  | 5-6-7 |
| Statistical methods        | <a href="#">#12a</a> | Describe all statistical methods, including those used to control for confounding                                                                                                                                                                                              | 5-6-7 |
| Statistical methods        | <a href="#">#12b</a> | Describe any methods used to examine subgroups and interactions                                                                                                                                                                                                                | 5-6-7 |
| Statistical methods        | <a href="#">#12c</a> | Explain how missing data were addressed                                                                                                                                                                                                                                        | 5-6-7 |
| Statistical methods        | <a href="#">#12d</a> | If applicable, describe analytical methods taking account of sampling strategy                                                                                                                                                                                                 | n/a   |
| Statistical methods        | <a href="#">#12e</a> | Describe any sensitivity analyses                                                                                                                                                                                                                                              | 5-6-7 |
| <b>Results</b>             |                      |                                                                                                                                                                                                                                                                                |       |
| Participants               | <a href="#">#13a</a> | Report numbers of individuals at each stage of study—eg numbers potentially eligible, examined for eligibility, confirmed eligible, included in the study, completing follow-up, and analysed. Give information separately for for exposed and unexposed groups if applicable. | 7     |
| Participants               | <a href="#">#13b</a> | Give reasons for non-participation at each stage                                                                                                                                                                                                                               | 7     |
| Participants               | <a href="#">#13c</a> | Consider use of a flow diagram                                                                                                                                                                                                                                                 | n/a   |

|                          |                      |                                                                                                                                                                                                                   |               |
|--------------------------|----------------------|-------------------------------------------------------------------------------------------------------------------------------------------------------------------------------------------------------------------|---------------|
| Descriptive data         | <a href="#">#14a</a> | Give characteristics of study participants (eg demographic, clinical, social) and information on exposures and potential confounders. Give information separately for exposed and unexposed groups if applicable. | 7-8-9         |
| Descriptive data         | <a href="#">#14b</a> | Indicate number of participants with missing data for each variable of interest                                                                                                                                   | 6-9-22        |
| Outcome data             | <a href="#">#15</a>  | Report numbers of outcome events or summary measures. Give information separately for exposed and unexposed groups if applicable.                                                                                 | 9 to13 and 22 |
| Main results             | <a href="#">#16a</a> | Give unadjusted estimates and, if applicable, confounder-adjusted estimates and their precision (eg, 95% confidence interval). Make clear which confounders were adjusted for and why they were included          | n/a           |
| Main results             | <a href="#">#16b</a> | Report category boundaries when continuous variables were categorized                                                                                                                                             | 5-13          |
| Main results             | <a href="#">#16c</a> | If relevant, consider translating estimates of relative risk into absolute risk for a meaningful time period                                                                                                      | n/a           |
| Other analyses           | <a href="#">#17</a>  | Report other analyses done—e.g., analyses of subgroups and interactions, and sensitivity analyses                                                                                                                 | 10-13         |
| <b>Discussion</b>        |                      |                                                                                                                                                                                                                   |               |
| Key results              | <a href="#">#18</a>  | Summarise key results with reference to study objectives                                                                                                                                                          | 12 & 15       |
| Limitations              | <a href="#">#19</a>  | Discuss limitations of the study, taking into account sources of potential bias or imprecision. Discuss both direction and magnitude of any potential bias.                                                       | 15            |
| Interpretation           | <a href="#">#20</a>  | Give a cautious overall interpretation considering objectives, limitations, multiplicity of analyses, results from similar studies, and other relevant evidence.                                                  | 13-17         |
| Generalisability         | <a href="#">#21</a>  | Discuss the generalisability (external validity) of the study results                                                                                                                                             | 16-17         |
| <b>Other Information</b> |                      |                                                                                                                                                                                                                   |               |
| Funding                  | <a href="#">#22</a>  | Give the source of funding and the role of the funders for the present study and, if applicable, for the original study on which the present article is based                                                     | 17            |



The STROBE checklist is distributed under the terms of the Creative Commons Attribution License CC-BY. This checklist was completed on 02. April 2021 using <https://www.goodreports.org/>, a tool made by the [EQUATOR Network](#) in collaboration with Penelope.ai
